# Supplementary material
Source: PubMed Central journal article supplement (PMC117056)
Supplement: nar_30_13_2930__1.pdf [file nar_30_13_2930__1.pdf]

GGCTACAGCAACACACCCGGGGCCAGGTTATTTTCAAAGATGCTTTAGCCCAGCAGTTGTGT  
GAACAAGGAG

Exon 5 → human 33 bp mouse 33 bp  
CTCCAACAGATGTCACTGTGCACCCACATCTAG

Exon 6 → human 79 bp mouse 79 bp

CTGAAATACATAGTGACAGCATTATCCTGAGAGATGACTTTGACTCCTACCACCAACTGCAAT  
TAAATCCAAATATATG

Exon 7 → human 97 bp mouse 97 bp

GGTTGAATGTAACAACACTGTGAGACTGGAGAACAGTGTGGCGCGATTATGCATGGCAATGCC  
GTCACCTTCTGTGAACCATATGGCCCACGAGAACTG

Exon 8 → human 52 bp mouse 52 bp  
ATTACCACAGGCCTTAATACAACAACAGCTTCTGTCTCCAATTTTCCATTG

Exon 9 → human 97 bp mouse 97 bp

GGTCAGGTTTCATGTCGCTTTAGTTATTCAGACCCCAGCATCATCGTGTTATATGCCAAGAATA  
ACTCTGCGGACTGGATTCAGCTAGAGAAAATTAG

Exon 10 → human 241 bp mouse 241 bp

AGCCCCTTCCAATGTCAGCACAATCATCCATATCCTCTACCTTCCTGAGGACGCCAAAGGGG  
AGAATGTCCAATTTTCAAGTGGAAAGCAGGAAAATCTTCGTGTAGGTGAAGTGTATGAAGCCTGC  
TGGGCCTTAGATAACATCTTGATCATCAATTCAGCTCACAGACAAGTCGTTTTAGAAGATAGT  
CTCGACCCAGTGGACACAGGCAACTGGCTTTTTCTTCCCAGGAGCTACAGTTAAG

Exon 11 → human 146 bp mouse 146 bp

CATAGCTGTCAGTCAGATGGGAACTCCATTTATTTCCATGGAAATGAAGGCAGCGAGTTCAA  
TTTTGCCACCACCAGGGATGTAGATCTTTCCACAGAAGATATTCAAGAGCAATGGTCAGAAG  
AATTTGAGAGCCAGCCTACAGG

Exon 12 → human 152 bp mouse 152 bp

ATGGGATGTCTTGGGAGCTGTCATTGGTACAGAATGTGGAACGATAGAATCAGGCTTATCAA  
TGGTCTTCTCAAAGATGGAGAGAGGAAATTATGCACTCCATCCATGGACACTACCGGTTAT  
GGAACCTGAGGTTTTACTTTGTGATGG

Exon 13 → human 113 bp mouse 113 bp

GAGGAATTTGTGACCCTGGAAATTCTCATGAAAATGACATAATCCTGTATGCAAAAATTGAAG  
GAAGAAAAGAGCATATAACACTGGATACCCTTTTCTATTCTCATATAAG

Exon 14 → human 209 bp mouse 209 bp

GTTCCGTCTTTGGTTTCTGTGGTCATCAATCCTGAACTTCAGACTCCTGCTACCAAATTTTGT  
CTCAGGCAAAGAACCATCAAGGACATAATAGGAATGTCTGGGCTGTAGACTTTTTCCATGT  
CTTGCCTGTTCTCCCTTCTACAATGTCTCACATGATACAGTTTTTCCATCAATCTGGGATGTGG  
AACGCATCAGCCTGGTAACAG

Exon 15 → human 129 bp mouse 129 bp

TGTCAGCTTGGAAATTTTCTACCAACCATGGGCGCTCCTGGTCCCTCCTTCACACTGAATGCT  
TACCTGAGATCTGTGCTGGACCCACCTCCCCACAGCACTGTCTACTCCTCTGAAAACACTAC  
AGTGG

Exon 16 → human 110 bp mouse 110 bp

GTGGAACCGAATAACAATTCCCCTTCCCTAACGCAGCACTAACCCGGAACACCAGGATTCGCT  
GGAGACAAACAGGACCAATCCTTGGAAACATGTGGGCAATTGATAATG

Exon 17 → human 67 bp mouse 67 bp

TTTATATTGGCCCGTCATGTCTCAAATTCTGTTCTGGCAGAGGACAGTGCCTAGACATGGT  
TGCAA

Exon 18 → human 234 bp mouse 234 bp

GTGTGACCCTGGATTTTCTGGCCAGCTTGTGAGATGGCATCCCAGACATTCCCAATGTTTA  
TTTCTGAAAGCTTTGGCAGTTCCAGGCTCTCCTCTTACCATAACTTTTACTCTATCCGTGGTG  
CTGAAGTCAGCTTTGGTTGTGGTGTCTTGGCCAGTGGTAAGGCCCTGGTTTTCAACAAAGAA  
GGGCGGCGTCAGCTAATTACATCTTTCCTTGACAGCTCACAATCCAG

Exon 19 → human 162 bp mouse 162 bp

GTTTCTCCAGTTCACACTGAGACTGGGGAGCAAATCTGTTCTGAGCACGTGCAGAGCCCCT  
GATCAGCCTGGTGAAGGAGTTTTGCTGCATTATTCTTATGATAATGGGATAACTTGGAACTC  
CTGGAGCATTATTCATATCTCAGCTATCATGAGCCCAG

Exon 20 → human 237 bp mouse 237 bp

AATAATCTCCGTAGAACTACCAGGTGATGCAAAGCAGTTTGGAAATTCAGTTCAGATGGTGGC  
AACCGTATCATTCTTCCCAGAGAGAAGATGTATGGGCTATTGATGAGATTATCATGACATCTG  
TGCTTTTCAACAGCATTAGTCTTGACTTTACCAATCTTGTGGAGGTCACTCAGTCTCTGGGAT  
TCTACCTTGGAAATGTTTCAGCCATACTGTGGCCACGACTGGACCCTTTG

Exon 21 → human 193 bp mouse 193 bp

TTTTACAGGAGATTCTAAACTTGCCTCAAGTATGCGCTATGTGGAAACACAATCAATGCAGAT  
AGGAGCATCCTATATGATTAGTTCAGTTTGGTGTATGGGATGTGGCCAGAAATACACCCCAC  
ACATGGACAACCAGGTGAAGCTGGAGTACTCAACCAACCACGGCCTTACCTGGCACCTCGT  
CCAAGAA

Exon 22 → human 113 bp mouse 113 bp

GAATGCCTTCCAAGTATGCCAAGTTGTCAGGAATTTACATCAGCAAGTATTTACCATGCCAGT  
GAGTTTACACAGTGGAGGAGAGTCATAGTGCTTCTTCCCCAGAAAACCTTG

Exon 23 → human 138 bp mouse 138 bp

GTCCAGTGCTACCCGTTTCCGCTGGAGCCAGAGCTATTACACAGCTCAAGACGAGTGGGCT  
TTGGACAGCATTACATTGGGCAGCAGTGCCCAACATGTGCAGTGGGCATGGCTCATGCG  
ATCATGGCATATGCAG

Exon 24 → human 187 bp mouse 187 bp

GTGTGACCAGGGGTACCAAGGCACTGAATGCCACCCAGAAGCTGCCCTTCCGTCCACAATT  
ATGTCAGATTTTTGAGAACCAGAATGGCTGGGAGTCTGACTGGCAAGAAGTTATTGGGGGAG  
AAATTGAAAACCAGAACAAGGGTGTGGTGTCTCTCTTCTGGATCATCTCTGTACTTCAGCA  
AG

Exon 25 → human 206 bp mouse 206 bp

GCTGGGAAAAGACAGCTGGTGAGTTGGGACCTGGATACTTCTTGGGTGGACTTTGTCCAGT  
TCTACATCCAGATAGGCGGAGAGAGTGTTCATGCAACAAGCCTGACAGCAGAGAGGGAGGG  
CGTCCTCCTTCAGTACAGCAACAATGGGGGCATCCAGTGGCACCTGCTAGCAGAGATGTAC  
TTTTCAGACTTCAGCAAACCCAG

Exon 26 → human 172 bp mouse 172 bp

ATTTGTCTATCTGGAGCTTCCAGCTGCTGCCAAGACCCCTTGCACCAGGTTCCGCTGGTGG  
CAGCCCGTGTCTCAGGGGAGGACTATGACCAGTGGGCAGTCGATGACATCATCATTCTGT  
CCGAGAAGCAGAAGCAGATCATCCCAGTTATCAATCCAACCTTTACCTCAG

Exon 27 → human 201 bp mouse 201 bp

AACTTTTATGAGAAGCCAGCTTTTTGATTACCCTATGAATCAGATGAGTGTGTGGTTGATGTTG  
GCTAATGAAGGAATGGTTAAAAATGAAACCTTCTGTGCTGCCACACCATCAGCAATGATATTT  
GGAAAATCAGATGGAGATCGATTTGCAGTAACTCGAGATTTGACCCTGAAACCTGGATATGT  
GCTACAGTTCAAG

Exon 28 → human 233 bp mouse 233 bp

CTAAACATAGGTTGTGCCAATCAATTCAGCAGTACTGCTCCAGTTCTTCTTCAGTACTCTCAT  
GATGCTGGTATGTCTGGTTTCTGGTGAAAGAAGGCTGTTACCCGGCTTCTGCAGGCAAAG  
GATGCGAAGGAAACTCCAGAGAACTAAGTGAGCCCACCATGTATCACACAGGGGACTTTGA  
AGAATGGACAAGAATCACCATTGTTATTCCAAGGTCTCTTGCATCCAG

Exon 29 → human 158 bp mouse 158 bp

CAAGACCAGATTCCGATGGATCCAGGAGAGCAGCTCACAGAAAAACGTGCCTCCATTTGGT  
TTAGATGGAGTGTACATATCCGAGCCTTGTCCCAGTTACTGCAGTGGCCATGGGGACTGCAT  
TTCAGGAGTGTGTTTCTGTGACCTGGGATATACTG

Exon 30 → human 208 bp mouse 208 bp

CTGCACAAGGAACCTGTGTGTCAAATGTCCCAATCACAATGAGATGTTTCGATAGGTTTGAG  
GGGAAGCTCAGCCCTCTGTGGTACAAGATAACAGGTGCCCAGGTTGGAAGTGGCTGTGGAA  
CACTTAACGATGGCAAATCTCTCTACTTCAATGGCCCTGGGAAAAGGGAAGCCCGGACGGT  
CCCTCTGGACACCAGGAATATCAG

Exon 31 → human 78 bp mouse 77 bp

ACTTGTTCAATTTTATATACAAATTGGAAGCAAACTTCAGGCATTACCTGCATCAAACCAAG  
AACTAGAAATGAAGG

Exon 32 → human 158 bp mouse 159 bp

GCTTATTGTTTCAGTATTCAAATGACAATGGGATACTCTGGCATTGCTTCGAGAGTTGGACTT  
CATGTCCTTCCCTGGAACACAGATCATTTCCATTGACCTGCCACAGGACGCGAAGACACCTG  
CAACGGCATTTCGATGGTGGCAACCGCAACATG

Exon 33 → human 189 bp mouse 189 bp

GGAAGCATTTCAGCCCAGTGGGCTTTGGATGATGTTCTTATAGGAATGAATGACAGCTCTCAA  
ACTGGATTTCAAGACAAATTTGATGGCTCTATAGATTTGCAAGCCAAGTGGTATCGAATCCAA  
GGAGGTCAAGTTGATATTGACTGTCTCTCTATGGATACTGCTCTGATATTCACTGAAAACATA  
G

Exon 34 → human 274 bp mouse 274 bp

GAAAACCTCGTTATGCTGAGACCTGGGATTTTCATGTGTCAGCATCTACCTTTTTGCAGTTTG  
AAATGAGCATGGGCTGTAGCAAGCCCTTCAGCAACTCCCACAGTGTACAGCTCCAGTATTCT  
CTGAACAATGGCAAGGACTGGCATCTTGTCAACGAAGAGTGTGTTCCCTCCAACCATGGCTG  
TCTGCATTACACGGAAAGTTCAATTTACACCTCGGAAAGATTCCAGAATTGGAAGCGGATCA  
CTGTCTACCTTCCACTCTCCACCAT

Exon 35 → human 141 bp mouse 141 bp

TTCTCCCAGGACCCGGTTCAGATGGATTCAGGCCAACTACACTGTGGGGGCTGATTCCTGG  
GCGATTGATAATGTTGTAAGTGGCTCAGGGTGGCCCTTGGATGTGCTCAGGACGAGGGATTT  
GTGATGCTGGACGCTGTGT

Exon 36 → human 178 bp mouse 178 bp

GTGTGACCGGGGCTTTGGTGGACCCTATTGTGTTCCCTGTTGTTCCCTCTGCCCTCGATTCTTA  
AAGACGATTTCAATGGGAATTTACATCCTGACCTTTGGCCTGAAGTGTATGGTGCAGAGAGG  
GGGAATCTGAATGGTGAACCATCAAATCTGGAACATCTCTAATTTTTAAAGG

Exon 37 → human 85 bp mouse 85 bp

GAAGGACTAAGGATGCTTATTTCAAGAGATCTAGATTGTACAAATACAATGTATGTCCAGTTT  
TCACTTAGATTTATAGCAAAAA

Exon 38 → human 183 bp mouse 183 bp

GTACCCAGAGAGATCTCACTCTATTCTGTTACAATTCTCCATCAGTGGAGGAATCACTTGG  
CACCTGATGGATGAATTTTACTTTCTCAAACAACGAATATACTTTTCATCAATGTTCCCTTGC  
CATACACTGCCCAAACCAATGCTACAAGATTCAGACTCTGGCAACCTTATAATAACG

Exon 39 → human 172 bp mouse 172 bp

GTAAGAAAGAAGAAATCTGGATTGTTGATGACTTCATTATCGATGGAAATAATGTAAACAACC  
CTGTGATGCTCTTGGATACATTTGATTTTGGGCCAGAGAAGACAATTGGTTTTTCTATCCTG  
GTGGTAACATCGGTCTTTATTGTCCATATTCTTCAAAGGGGGCACC

Exon 40 → human 103 bp mouse 103 bp

TGAAGAAGATTCAGCTATGGTGTGTTTGTTCAAATGAAGTTGGTGAGCATTCCATTACCACCCG  
TGACCTAAATGTGAATGAGAACACCATCATACAATTTGAG

Exon 41 → human 230 bp mouse 230 bp

ATCAACGTTGGCTGTTTCGACTGATAGCTCATCCGCGGATCCAGTGAGACTGGAATTTTCAAG  
GGACTTCGGGGCGACCTGGCACCTTCTGCTGCCCTCTGCTACCACAGCAGCAGCCACGT  
CAGCTCTTTATGCTCCACCGAGCACCACCCAGCAGCACCTACTACGCAGGAACCATGCAG  
GGCTGGAGGAGGGAGGTGCGTGCACCTTTGGGAAGCTGCACCTTTGTGG

Exon 42 → human 221 bp mouse 221 bp

ATCTGTCCGTTTCAGATGGTACCAGGGATTTTACCCTGCCGGCTCTCAGCCAGTGACATGG  
GCCATTGATAATGTCTACATCGGTCCCCAGTGTGAGGAGATGTGTAATGGACAGGGGAGCT  
GTATCAATGGAACCAAATGTATATGTGACCCTGGCTACTCAGGTCCAACCTGTAAAATAAGC  
ACCAAAAATCCTGATTTTCTCAAAGATGATTTTGAAG

Exon 43 → human 148 bp mouse 148 bp

GTCAGCTAGAATCTGATAGATTCTTATTAATGAGTGGTGGGAAACCATCTCGAAAGTGTGGA  
ATCCTTTCTAGTGGAAACAACCTCTTTTTCAATGAAGATGGCTTGCGCATGTTGATGACACGA  
GACCTGGATTTATCACATGCTAG

Exon 44 → human 259 bp mouse 259 bp

ATTTGTGCAGTTCTTCATGAGACTGGGATGTGGTAAAGGCGTTCCTGACCCAGGAGTCAAC  
CCGTGCTCCTACAGTATTCTCTCAACGGTGGCCTCTCGTGGAGTCTTCTTCAGGAGTTCCTT  
TTCAGCAATTCCAGCAATGTGGGCAGGTACATTGCCCTGGAGATACCCTTGAAAGCCCGTTC  
TGGTTCTACTCGCCTTCGCTGGTGGCAACCGTCTGAGAATGGGCACTTCTACAGCCCCTGG  
GTTATCGATCAG

Exon 45 → human 250 bp mouse 250 bp

ATTCTTATTGGAGGAAATATTTCTGGTAATACGGTCTTGGGAAGATGATTTTACAACCCTTGAT  
AGTAGGAAATGGCTGCTTCACCCAGGAGGCACCAAGATGCCCGTGTGTGGCTCTACTGGTG  
ATGCCCTGGTCTTCATTGAAAAGGCCAGCACCCGTTACGTGGTCAGCACAGACGTTGCCGT  
GAATGAGGATTCCTTCTACAGATAGACTTCGCTGCCTCCTGCTCAGTCACAGACTCTTGT  
ATG

Exon 46 → human 169 bp mouse 169 bp

CGATTGAATTGGAATACTCAGTAGATCTTGGATTGTCATGGCACCCATTGGTAAGGGACTGT  
CTGCCTACCAATGTGGAATGCAGTCGCATCATCTGCAACGGATCCTGGTGTGACAGACTTT  
CAACAAGTGGACTAGAATCACTCTGCCTCTCCCTCCTTATACCAG

Exon 47 → human 141 bp mouse 141 bp

GTCCCAAGCCACTCGTTTTCCGTTGGCATCAACCAGCTCCTTTTGACAAGCAGCAGACATGG  
GCAATAGATAATGTCTATATCGGGGATGGCTGCATAGACATGTGCAGTGGCCATGGGAGAT  
GCATCCAGGGAAACTGCGT

Exon 48 → human 179 bp mouse 179 bp

CTGTGATGAACAGTGGGGTGGCCTGTACTGTGATGACCCCGAGACCTCTCTTCCAACCCAA  
CTCAAAGACAACCTCAATCGAGCTCCATCCAGTCAGAACTGGCTGACTGTGAACGGAGGGA  
AATTGAGTACAGTGTGTGGAGCCGTGGCGTCGGGAATGGCTCTCCATTTTCACTGGGG

Exon 49 → human 193 bp mouse 193 bp

GTTGTAGTCGATTATTAGTCACTGTGGATCTAAACCTCACTAATGCTGAGTTCATCCAATTTT  
ACTTCATGTATGGGTGCCTGATTACACCAAACAACCGTAACCAAGGTGTTCTCTTGGAAATATT  
CTGTCAATGGAGGCATTACCTGGAACCTGCTCATGGAGATTTTCTATGACCAGTACAGTAAG  
CCCGG

Exon 50 → human 257 bp mouse 257 bp

ATTTGTGAATATCCTTCTCCCTCCTGATGCTAAAGAGATTGCCACTCGCTTCCGCTGGTGGC  
AGCCAAGACATGACGGCCTGGATCAGAACGACTGGGCCATTGACAATGTCCTCATCTCAGG  
CTCTGCTGACCAAAGGACCGTTATGCTGGACACCTTCAGCAGCGCCCCAGTACCCCAGCAC  
GAGCGTCCCCTGCAGATGCCGGCCCTGTCGGGAGGATCGCCTTTGACATGTTTATGGAAG  
ACAAAACCTTCAG

Exon 51 → human 155 bp mouse 155 bp

TGAATGAGCACTGGCTATTCCATGATGATTGTACAGTAGAAAGATTCTGTGACTCCCCTGAT  
GGTGTGATGCTCTGTGGCAGTCATGATGGACGGGAGGTGTATGCAGTGACCCATGACCTGA  
CTCCCCTGAAGGCTGGATTATGCAATTCAAG

Exon 52 → human 215 bp mouse 215 bp

ATCTCAGTTGGATGTAAGGTGTCTGAAAAAATTGCCCAGAATCAAATTCATGTGCAGTATTCT  
ACTGACTTCGGTGTGAGTTGGAATTATCTGGTCCCTCAGTGCTTGCCTGCTGACCCAAAATG  
CTCTGGAAGTGTCTCAGCCATCTGTATTCTTTCCAATAAAGGGTGGAAAAGGATCACCTA  
CCCACCTTCTGAAAGCTTAGTGGGAAA

Exon 53 → human 178 bp mouse 178 bp

TCCGGTAAGGTTTAGGTTCTATCAGAAGTACTCAGACATGCAGTGGGCAATCGATAATTTCT  
ACCTGGGCCCTGGATGCTTGGACAACCTGCAGGGGCCATGGAGATTGCTTAAGGGAACAGTG  
CATCTGTGATCCGGGATACTCAGGGCCAACTGCTACTTGACCCACACTCTGAAG

Exon 54 → human 176 bp mouse 176 bp

ACTTTCCTGAAGGAACGCTTTGACAGTGAAGAAATCAAACCTGACTTATGGATGTCCTTAGAA  
GGTGGAAAGTACTTGCCTGAGTGTGGAATTCTTGCCGAGGACACTGCACTCTATTTTGGGG  
GATCCACTGTGAGACAAGCGGTTACACAAGATTTGGATCTTCGAGGTGCAAA

Exon 55 → human 107 bp mouse 107 bp

GTTCTGCAATACTGGGGGCGCATCGGTAGTGAGAACAACATGACCTCTTGCCATCGTCCC  
ATCTGCCGGAAGGAAGGCGTGCTGTTGGACTACTCTACCGATGGAG

Exon 56 → human 243 bp mouse 243 bp

GAATTACCTGGACTTTGCTCCATGAGATGGATTACCAGAAATACATTTCTGTTAGACACGACT  
ACATACTTCTTCTGAAGATGCCCTCACCAACACAACCTCGACTTCGCTGGTGGCAGCCTTTT  
GTGATCAGCAATGGAATTGTGGTCTCTGGGGTGGAGCGTGCTCAGTGGGCACTGGACAACA  
TTTTGATTGGTGGAGCAGAAATCAATCCCAGCCAATTGGTGGACACTTTTGATGATG

Exon 57 → human 177 bp mouse 176 bp

AAGGCACTTCCCATGAAGAAAACCTGGAGTTTTTACCCTAATGCTGTAAGGACAGCAGGATTT  
TGTGGCAATCCATCCTTTACCTCTATTGGCCAAATAAAAAGAAGGACAAGACTCACAATGCT  
CTCTCCTCCCGAGAACTCATTATACAGCCAGGATACATGATGCAGTTTAAAA

Exon 58 → human 74 bp mouse 75 bp

TTGTGGTGGGTTGTGAAGCCACTTCTTGTGGTGACCTTCATTCCGTAATGCTGGAATACACT  
AAGGATGCAAGA

Exon 59 → human 161 bp mouse 161 bp

TCGGATTCTGGCAGCTCGTACAGACCCAGTGCCTTCCTTCCTCTTCTAACAGCATTGGCTG  
CTCCCCTTTCCAGTTCCATGAAGCCACCATCTACAACCTCTGTCAACAGCTCAAGCTGGAAAA  
GAATCACCATCCAGCTGCCTGACCATGTCTCCTCTAG

Exon 60 → human 158 bp mouse 158 bp

TGCAACACAGTTCCGCTGGATCCAGAAGGGAGAAGAACTGAGAAGCAAAGCTGGGCAATT  
GACCACGTGTACATTGGAGAGGCTTGCCCCAAGCTCTGCAGCGGGCAGGATACTGCACG  
ACCGGTGCCATCTGCATCTGCGACGAGAGCTTCCAAG

Exon 61 → human 220 bp mouse 220 bp

GTGATGACTGCTCTGTTTTAGTCACGACCTTCCCAGTTATATTAAGATAATTTTTGAGTCCG  
CAAGAGTCACCGAGGCAAACCTGGGAGACCATTCAAGGTGGAGTCATAGGAAGTGGCTGTGG  
GCAGCTGGCCCCCTACGCCCATGGAGACTCACTGTACTTTAATGGCTGTCAGATCAGGCAA  
GCAGCTACCAAGCCTCTGGATCTCACTCGAGCAAG

Exon 62 → human 198 bp mouse 198 bp

CAAAATCATGTTTGTGTTTTGCAAATTGGGAGCATGTGCGACGACGGACAGCTGCAACAGTGACC  
TGAGTGGCCCCCAGCTGTGGACAAGGCGGTGCTGCTGCAATACAGCGTCAACAACGGGA  
TCACCTGGCATGTCATCGCCAGCACCAGCCAAAGGACTTCACACAAGCTCAGAGAGTGTC  
TTACAATGTCCCCCT

Exon 63 → human 99 bp mouse 99 bp

GGAGGCACGGATGAAAGGAGTCTTACTGCGCTGGTGGCAACCACGCCACAATGGAACAGG  
TCATGATCAATGGGCTTTGGACCATGTGGAGGTCGTCT

Exon 64 → human 6 bp mouse 6 bp  
AGTAAG

Exon 65 → human 1119 bp mouse 1104 bp

CACTCGCAAACAAAATTACATGATGAATTTTTACGACAACATGGGCTCAGACATTTCTACAA  
CAGAAGACGAAGGTCACCTTAGGCGATACCCATGAAGAATCAAAAAGTTATTTTTTTCTTCC  
AACATGTGATGTGTTGCTCTCCATTCTTTAAATCTCGCACTACATCTGATATCAGGAAATATC  
TGTGAAGGACTTGGTGATTACCTGAAAGCCCTTCTCAAGACCGAGTGTACACCACCTTTCCCA  
CACTGTGAACTAATGACAAGTGACTTATTTGCTCATAAGTAAATGTCTTCATGTTGATGTGTC  
CGTGAAGTTGTGATCTGTTGTAATATCAGTTACAGTGGCAGTATTGACAATAAGAAACAGTT  
TAACAGAAAAATGAAATTTAAGCACAAAAAATTTAAGAGATTTTATGTTTAAAATGGCATTAG  
CACAGTATTTAACATTCTTGGTCACAAAGCTATTTAAGTGGACTGTATTTAGCTATGTCTCAT  
GTTTTATATGATTAATTATCATTGTTTGCCTTTATGTATTCTTCTACAATACAACACATTG  
AAACTGTATTTACTTGTATGTTGTAATTTTTGCTGCTGAATTTGGGGCTACTTATATTCTGC  
AGAAAATTAATTGAAATACCTATTCAAGAAGATAGTTGTAAAGATATTGTATCTCCTTTAATAT  
ACTCCTTAAAAATGTATGTTGGTTTAGCGTTGTTTTGTGGATAAGAAAAATGCTTGACCCTGA  
AATATTTTCTACTTTAAATTGTGGATGAAGACCCTATCTCCACAAATAAGTTCCCATTTCTT  
GTCTAAAGATCTTTTTTAAAGTGTCTGTGGCTGATTTACTAACAGTAACTGCCATTTTTTGTG  
TGTGATAACAGAGTGATTTGTAACAGTGGTTGTTTTTTCATTGTGTTTTCTTCGTGGATTGT  
TTTTTCTGCGGGTCATATTCATACCTTCTGATGAAGTTGTACAACACCAGCAACATTATAATG  
GCCCTGTAGCTCTGAATGCTATTTGTGTAAGTAAAGGTTGCACTCTAGGGTGAACCAAGCT  
ATAAAAGCCCATGCTTAAATAAAAATTATGTCCAAAAGCC- 3'
